# Supplementary material
Source: Royal Society of Chemistry journal article supplement (doi:10.1039/d6cp00106h)
Supplement: d6cp00106h1.pdf [file d6cp00106h1.pdf]

## Supporting Information Text

# Polaron formation in Ferroelectric PbTiO<sub>3</sub>: An Ab Initio Theoretical Study

Zhimeng Hao, Taifeng Liu\*

National & Local Joint Engineering Research Center for Applied Technology of Hybrid Nanomaterials, Henan University, Kaifeng 475004, China

Corresponding author: Taifeng Liu: tliu@vip.henu.edu.cn

### 1. Computational Details of the Periodic Supercell Approach

To verify our results, we conducted spin-polarized DFT calculations using the VASP software package<sup>1,2</sup> and compared the local conditions and formation energy changes of electron polarons with and without SOC considered. Firstly, the original unit cell of tetragonal PbTiO<sub>3</sub> was optimized using the exchange-correlation functional (PBE) in the generalized gradient approximation<sup>3</sup>. The plane-wave cutoff energy was set to 500 eV, and the convergence threshold for the self-consistent electronic calculation was set to 10<sup>-4</sup> eV. The first-principles calculation method based on density functional theory + Hubbard U correction (DFT+U) was adopted to simulate the formation process of electron polarons. A 3×3×3 supercell system containing 135 atoms was selected as the calculation model. To effectively overcome the self-interaction error existing in the traditional DFT method, we referred to the parameterization scheme proposed by Gou<sup>4</sup> et al. and applied a correction parameter of U = 4.75 eV on the 3d orbitals of Ti. When using the supercell model for calculation, a 2×2×2 K-point was adopted. The formation energy of polaron is as shown in Formula 9.

$$E_p(f) = E_T^p - E_T^{mp} \# \quad (1)$$

$E_T^p$  represents the energy when there are polarons in the structure,  $E_T^{np}$  represents the energy when there are no polarons in the structure, and  $E_p(f)$  is the energy difference between  $E_T^p$  and  $E_T^{np}$ .

## Reference

1. G. Kresse and J. Furthmüller, *Computational materials science*, 1996, **6**, 15-50.
2. G. Kresse and J. Furthmüller, *Physical review B*, 1996, **54**, 11169.
3. J. P. Perdew, K. Burke and M. Ernzerhof, *Phys. Rev. Lett.*, 1996, **77**, 3865.
4. G. Gou, J. W. Bennett, H. Takenaka and A. M. Rappe, *Physical Review B—Condensed Matter and Materials Physics*, 2011, **83**, 205115.
